# Supplementary material for: A Structure Variation in qPH8.2 Detrimentally Affects Plant Architecture and Yield in Rice
Source: MDPI journal article supplement (doi:10.3390/plants12183336), 2023-09-21
Supplement: s1 [file s1]

---

**Table S3.** The presence of a 42-kb insertion in different subgroups of rice

| Variety Name                      | Genotype | Subgroup           |
|-----------------------------------|----------|--------------------|
| Nipponbare                        | presence | Temperate japonica |
| Qiutianxiaoting                   | presence | Temperate japonica |
| Kongyu 131                        | presence | Temperate japonica |
| Qingjinzaosheng                   | presence | Temperate japonica |
| MAEKJO::IRGC 77666-1              | presence | Temperate japonica |
| MR 19                             | presence | Temperate japonica |
| 91-382::IRGC 63464-1              | presence | Temperate japonica |
| Jinyuan 85                        | presence | Temperate japonica |
| Zhonghua 11                       | presence | Temperate japonica |
| Daohuangxiang                     | presence | Temperate japonica |
| MALAGKIT (PINELIPE)::IRGC 67444-1 | absence  | Tropical japonica  |
| BUKU::IRGC 28683-2                | absence  | Tropical japonica  |
| SAHULO FACHE SOYO::IRGC 66630-1   | absence  | Tropical japonica  |
| SAL BUI BAO                       | absence  | Tropical japonica  |
| VARIRANGAHY::IRGC 69897-1         | absence  | Tropical japonica  |
| American Huangkedao               | absence  | Tropical japonica  |
| Azucena                           | absence  | Tropical japonica  |
| KETAN NANGKA::IRGC 19961-2        | absence  | Tropical japonica  |
| ARC 11768::IRGC 21630-1           | absence  | Tropical japonica  |
| MAK BOUAP::IRGC 30106-3           | absence  | Tropical japonica  |
| PLE LIA::IRGC 73562-1             | absence  | Tropical japonica  |
| SHANGYIPA::IRGC 64928-1           | absence  | Tropical japonica  |
| SOM::IRGC 92221-1                 | absence  | Tropical japonica  |

---

|                                   |         |                   |
|-----------------------------------|---------|-------------------|
| KAUK PAHLING::IRGC 95823-2        | absence | Tropical japonica |
| CHAO MEO::IRGC 80273-1            | absence | Tropical japonica |
| IH PEN SHIM MING::IRGC 26067-1    | absence | Indica            |
| Kahamu                            | absence | Indica            |
| TAICHUNGNATIVE1                   | absence | Indica            |
| Guangluai 4                       | absence | Indica            |
| Tek Si Chut                       | absence | Indica            |
| Zhenshan 97                       | absence | Indica            |
| MUKKALA BAZAL::IRGC 77279-1       | absence | Indica            |
| Cisadane                          | absence | Indica            |
| ITA 117::IRGC 75235-1             | absence | Indica            |
| MBEIMBEIHUN::IRGC 69730-1         | absence | Indica            |
| IRGA 318-11-6-9-2B::IRGC 117339-1 | absence | Indica            |
| WAS 173-B-B-6-2-2::C1             | absence | Indica            |
| KHAO GRADOOK CHAHNG::IRGC 17111-1 | absence | Indica            |
| X 21                              | absence | Indica            |
| Budda                             | absence | Indica            |
| Chorofa                           | absence | Indica            |
| PSBRC 80                          | absence | Indica            |
| IR64                              | absence | Indica            |
| PR 106::IRGC 53418-1              | absence | Indica            |
| 9311                              | absence | Indica            |
| DERAWA::IRGC 64106-1              | absence | Indica            |
| HERATH BANDA::IRGC 67630-1        | absence | Indica            |
| LALKA (LAL DHAN)::IRGC 64946-1    | absence | Indica            |
| ZINYA KOLAMBA::IRGC 52402-1       | absence | Indica            |

---

|                                  |         |         |
|----------------------------------|---------|---------|
| BR 116-3B-53::IRGC 39559-2       | absence | Indica  |
| LU DI GOCHYA::IRGC 26504-2       | absence | Indica  |
| OR 117-8::IRGC 39680-2           | absence | Indica  |
| GOBOL SAIL (BALAM)::IRGC 26624-2 | absence | Indica  |
| LARHA MUGAD::IRGC 52339-1        | absence | Indica  |
| AC 13 (T 141)::IRGC 5456-1       | absence | Indica  |
| BUCAYAB::IRGC 44357-1            | absence | Indica  |
| LUO SI ZHAN::IRGC 67211-1        | absence | Indica  |
| PHAN PHAE::IRGC 29652-2          | absence | Indica  |
| Tun Sart                         | absence | Indica  |
| Khao Dawk Mali 105               | absence | Indica  |
| E 21::IRGC 33929-2               | absence | Indica  |
| GAM PERNG::IRGC 62135-1          | absence | Indica  |
| LIMA::IRGC 81487-1               | absence | Indica  |
| KHAO YAI GUANG::IRGC 65972-1     | absence | Indica  |
| ARC 11777::IRGC 21639-1          | absence | Aus     |
| JHONA 101::IRGC 27976-1          | absence | Aus     |
| HODARAWALA::IRGC 67631-1         | absence | Aus     |
| DV 86::IRGC 8840-1               | absence | Aus     |
| AMAKOYALI::IRGC 60878-1          | absence | Aus     |
| HIJOL DIGA::IRGC 31655-1         | absence | Aus     |
| KASALATH                         | absence | Aus     |
| NA TEL BORO::IRGC 34749-1        | absence | Aus     |
| KASHA::IRGC 83865-1              | absence | Basmati |
| ARC 18578::IRGC 42459-2          | absence | Basmati |
| Binam                            | absence | Basmati |

---

|                         |         |             |
|-------------------------|---------|-------------|
| Karnal Local            | absence | Basmati     |
| JADO::IRGC 61966-1      | absence | Basmati     |
| Basmati 334             | absence | Basmati     |
| ARC 10497::IRGC 12485-1 | absence | Basmati     |
| wild12                  | absence | O.rufipogon |
| wild65                  | absence | O.rufipogon |
| wild111                 | absence | O.rufipogon |
| wild131                 | absence | O.rufipogon |
| wild219                 | absence | O.rufipogon |
| wild273                 | absence | O.rufipogon |
| DY159                   | absence | O.rufipogon |

---
