# Supplementary material for: A Structure Variation in qPH8.2 Detrimentally Affects Plant Architecture and Yield in Rice
Source: MDPI journal article supplement (doi:10.3390/plants12183336), 2023-09-21
Supplement: s1 [file s1]

**Table S2.** The primers used in this study

| Primers | Sequence (5'-3')                                                      |
|---------|-----------------------------------------------------------------------|
| RM5556  | Forward: GTAAGCCATTTGCACGGACAAGG<br>Reverse: GAGCTCAGGATCATCCCTACATGC |
| M5602   | Forward: ACCTAACGAAACCAAAGA<br>Reverse: TCGAGCAGGGTATCCAAT            |
| M8061   | Forward: TAATCACTCACCGCGTCACA<br>Reverse: TGTTGACGATGTTCCAAGGC        |
| M9060   | Forward: GCCATATGCGGTGTTCTTTT<br>Reverse: AGCGCATATCATGTTCAAGTTCG     |
| M1077   | Forward: ACCATTAAATTACGGCCAGCC<br>Reverse: CCTCTCAATTGACTGATTACGGT    |
| M1103   | Forward: TGAGCTATACTTGTTTGGAGAGAA<br>Reverse: AGAGGATGGCTGAATGGTGA    |
| M1307   | Forward: GCTACAATCCGTTTGCCGAT<br>Reverse: AAGGTGGACAGTCATTCTTCAA      |
| M1508   | Forward: TGTAGTGGGAAGGGAAAAAACA<br>Reverse: TGTGAACAGACTTCAAACGCT     |
| M9204   | Forward: GCATGCTCATTGCTGGGAT<br>Reverse: TCCCCCAAATAAACCCACTCT        |
| M9392   | Forward: CGATGACGTCTTTGCCGATT<br>Reverse: GCTAGAGGTCGGTGTTGCTA        |
| M9556   | Forward: CAAGCTGGTCATGTGTGCAT<br>Reverse: AAGGCGATTGCACAACTGA         |
| M9211   | Forward: GTGTGGGATGACATGGGTCT<br>Reverse: CAAAACGACGCAGCTGGTAA        |
| M9212   | Forward: CAGGTGGACCCCTTAAGTGG<br>Reverse: AAGGATGGGGGTGTAGGAGA        |
| M9285   | Forward: CTTTTCCCTGCCTGCTTTCC<br>Reverse: AGAGAAAAACACAAATCCCCTGA     |
| M9322   | Forward: TGCCTTTGATTGTGTAACCTTTG<br>Reverse: TACCAACCAGAGCAACCACT     |
| 01C131  | Forward: GTAGCTAGCTTCATCCGT<br>Reverse: AGTCATTCTAGCATTTCCGA          |
| 03C041  | Forward: TTTTATGGGTTGAGGGTAGA<br>Reverse: AACGTATTTGAGCTTGGCT         |
| 10C051  | Forward: TTGATTATTATGCAGGAGCA<br>Reverse: CGGATTTCCCTGTACATGTTT       |
