# Supplementary material for: A Structure Variation in qPH8.2 Detrimentally Affects Plant Architecture and Yield in Rice
Source: MDPI journal article supplement (doi:10.3390/plants12183336), 2023-09-21
Supplement: s1 [file s1]

---

**Table S1.** Single marker analysis of plant height in F<sub>2</sub> population

| Marker | Chr.  | Position   | <i>P</i> -Value |
|--------|-------|------------|-----------------|
| 01C131 | Chr1  | 41,979,406 | 4.27E-01        |
| 03C041 | Chr3  | 9,409,200  | 6.81E-02        |
| RM5556 | Chr8  | 4,583,190  | 7.50E-06        |
| M9060  | Chr8  | 9,060,149  | 4.61E-55        |
| M1508  | Chr8  | 15,084,166 | 6.17E-41        |
| 10C051 | Chr10 | 19,901,191 | 1.42E-01        |
